# Supplementary material for: Formation of [PtPd2(μ3-X)2(P–P)(dppmX)2]2+ (X = S, Se; P–P = dppe, 2 × PPh3) aggregates through activation of the chalcogen-rich [PtX4] ring by a PdI–PdI bond
Source: Royal Society of Chemistry journal article supplement (doi:10.1039/b811493e), 2008-01-01
Supplement: b811493e.pdf [file b811493e.pdf]

# Formation of $[\text{PtPd}_2(\mu_3\text{-X})_2(\text{P-P})(\eta\text{-dppmX})_2]^{2+}$ (X= S, Se; P-P=dppe, 2 x PPh<sub>3</sub>) Aggregates Through Activation of the Chalcogen-Rich $[\text{PtX}_4]$ Ring by Pd<sup>I</sup>-Pd<sup>I</sup> Bond

Jingqiu Li and T. S. Andy Hor<sup>a</sup>

## Experimental

### General Methods and Materials

All reactions were carried out with standard Schlenk techniques under an inert atmosphere of nitrogen. The following compounds were synthesized according to published procedures: Na<sub>2</sub>Se<sub>2</sub><sup>1</sup>, Pd<sub>2</sub>Br<sub>2</sub>(dppm)<sub>2</sub><sup>2</sup> and Pt<sub>2</sub>Cl<sub>2</sub>(dppm)<sub>2</sub><sup>3</sup>. All other reagents were of analytical grade and were used as received. The ligand Bis(diphenylphosphino)methane (dppm), 2-(Diphenylphosphino)pyridine (dppy), 1,2-Bis(diphenylphosphino)ethane (dppe), Triphenylphosphine (PPh<sub>3</sub>), Selenium powder, element sulfur, Platinum Chloride (PtCl<sub>2</sub>) and Ammonium Hexafluorophosphate (NH<sub>4</sub>PF<sub>6</sub>) were purchased from Sigma-Aldrich. <sup>1</sup>H and <sup>31</sup>P NMR spectra were recorded on Bruker ACF 300 and Bruker AMX 500 spectrometers, with chemical shifts (δ) reported relative to Me<sub>4</sub>Si. ESI mass spectra were obtained using a Finnigan LCQ. Elemental analyses were performed on a Perkin-Elmer PE 2400 elemental analyzer at the Department of Chemistry, National University of Singapore.

### Syntheses

**[Pt(η-Se)<sub>4</sub>(dppe)] 3**: An ethanol (5ml) solution of Na<sub>2</sub>Se<sub>2</sub>(46 mg, 0.23 mmol) was added to a suspension of PtCl<sub>2</sub>(dppe)(50 mg, 0.075 mmol) in EtOH(5 ml). The mixture was stirred for 5 h, after which the solvent was removed and the residue dried *in vacuo*. An aliquot of THF (15 ml) was introduced to give a red suspension which was filtered to give a bright red solution. Evaporation gave a solid residue that was vacuum dried and washed successively by Et<sub>2</sub>O (30 ml) and hexane (30 ml). Recrystallization from THF gave bright red crystals of **1.2** (24.2 mg, 35%). ESI-MS (MeOH/H<sub>2</sub>O): m/z (%) 969 ([M+2MeOH+H]<sup>+</sup>, 100%); <sup>31</sup>P{<sup>1</sup>H}NMR (CDCl<sub>3</sub>): δp = 47.1 ppm(s) (J<sub>Pt-P</sub> = 2804 Hz);

Complexes **4-7** were synthesized by the following method:  $[M_2L_2(dppm)_2]$  (0.024 mmol) was added into a solution of  $[PtS_4(P-P)]$  (0.024 mmol) with a molar ratio of 1:1 in MeOH. The mixture was stirred for 5 h and filtered by celite to obtain a clear yellow solution.  $NH_4PF_6$  (0.05 mmol) was added, turning the solution into a suspension. The precipitate was washed with deionized water and diethyl ether using vacuum suction filtration to yield powder of **4-7**.

**[PdPt( $\mu_3$ -S) $_2$ (PPh $_3$ ) $_2$ ( $\eta$ -dppmS) $_2$ ](PF $_6$ ) $_2$  4.** ESI-MS (MeOH/H $_2$ O): m/z (%) 913 ( $[M]^{2+}$ , 75%), 931.2 ( $[M+MeOH]^{2+}$ , 100%);  $^1H$ -NMR(CDCl $_3$ ):  $\delta$ = 3.5 ppm (m, 4H; CH $_2$  of dppm), 7.1-8.0 ppm (m, 70H; phenyl);  $^{31}P\{^1H\}$ NMR (CDCl $_3$ ):  $\delta_p$  = -43.0 ppm (d), 17.2 ppm ( $^1J_{(Pt-P)}$ = 3173 Hz), 22.4 ppm ( $^1J_{(Pt-P)}$ = 2790 Hz), 43.9 ppm; Element analysis: calcd (%) for C $_{86}H_{74}F_{12}P_8Pd_2PtS_4.CH_2Cl_2$ (2200.96): C 47.40, H 3.54; Found (%): C 47.42, H 3.72. Yield: 35 mg, 70%.

**[Pt $_3$ ( $\mu_3$ -S) $_2$ (PPh $_3$ ) $_2$ ( $\eta$ -dppmS) $_2$ ](PF $_6$ ) $_2$  5.** ESI-MS (MeOH/H $_2$ O): m/z (%) 986 ( $[M-S]^{2+}$ , 100%), 1103 ( $[M]^{2+}$ , 45%);  $^1H$ -NMR(CDCl $_3$ ):  $\delta$ = 3.5 ppm (m, 4H; CH $_2$  of dppm), 7.1-7.9 ppm (m, 70H; phenyl);  $^{31}P\{^1H\}$ NMR (CDCl $_3$ ):  $\delta_p$  = -55.3 ppm ( $^1J_{(Pt-P)}$ = 2712 Hz), -53.8 ppm ( $^2J_{(Pt-P)}$ = 2712 Hz), 10.0 ppm ( $^1J_{(Pt-P)}$ = 3253 Hz), 16.1 ppm ( $^2J_{(Pt-P)}$ = 3333 Hz), 43.9 ppm; Element analysis: calcd (%) for C $_{86}H_{74}F_{12}P_8Pt_3S_4.H_2O.CH_2Cl_2$ (2397.10): C 43.54, H 3.28; Found (%): C 43.40, H 3.29. Yield: 25 mg, 46%.

**[PdPt( $\mu_3$ -S) $_2$ (dppe)( $\eta$ -dppmS) $_2$ ](PF $_6$ ) $_2$  6.** ESI-MS (MeOH/H $_2$ O): m/z (%) 851 ( $[M]^{2+}$ , 100%);  $^1H$ -NMR(CDCl $_3$ ):  $\delta$  = 2.49 ppm (d, 4H; CH $_2$  of dppe), 3.48 ppm (m, 4H; CH $_2$  of dppm), 7.1-7.8 ppm (m, 60H; phenyl);  $^{31}P\{^1H\}$ NMR (CDCl $_3$ ):  $\delta_p$  = -43.8 ppm (d), 42.1 ppm (m,  $^1J_{(Pt-P)}$ = 2905 Hz), 43.3 ppm ( $^1J_{(Pt-P)}$ = 3114 Hz), 42.8 ppm; Element analysis: calcd (%) for C $_{76}H_{68}F_{12}P_8Pd_2PtS_4.CH_2Cl_2.H_2O$ (2092.93): C 44.12, H 3.46; Found (%): C 44.07; H 3.22. Yield: 40 mg, 72%.

**[Pt $_3$ ( $\mu_3$ -S) $_2$ (dppe)( $\eta$ -dppmS) $_2$ ](PF $_6$ ) $_2$  7.** ESI-MS (MeOH/H $_2$ O): m/z (%) 940 ( $[M]^{2+}$ , 100%), 924 ( $[M-S]^{2+}$ , 80%);  $^1H$ -NMR(CDCl $_3$ ):  $\delta$  = 2.4 ppm (d, 4H; CH $_2$  of dppe), 3.5 ppm (m, 4H; CH $_2$  of dppm), 7.1-7.9 ppm (m, 60H; phenyl);  $^{31}P\{^1H\}$ NMR (CDCl $_3$ ):  $\delta_p$  = -53.04 ppm ( $^1J_{(Pt-P)}$ = 2065 Hz), 42.01 ppm ( $^1J_{(Pt-P)}$ = 3175 Hz), 45.00 ppm; Element analysis: calcd (%) for C $_{76}H_{68}F_{12}P_8Pt_3S_4.4CH_3CN$ (2333.19): C 43.21, H 3.45; Found(%): C43.50, H 3.36. Yield: 27 mg, 45%.

Complexes **8-9** were synthesized by the following method: Solid  $M_2L_2(dppm)_2$  (0.022mmol) was added to a  $CH_2Cl_2$  solution of  $PtSe_4(dppe)$  (0.022mmol) with ratio of 1:1. The mixture was stirred for 5 h and filtered by celite to obtain a clear red solution. After vacuum dried and changed solvent to MeOH, solid  $NH_4PF_6$  was added to turn a solution into suspension. The dark red precipitate was allowed to settle, collected by suction filtration and washed with deionized water and  $Et_2O$  to yield powder of **8** and **9**.

**[PdPt( $\mu_3$ -Se) $_2$ (dppe)( $\eta$ -dppmSe) $_2$ ](PF $_6$ ) $_2$  8.** ESI-MS (MeOH/H $_2$ O): m/z (%) 945.5 ([M] $^{2+}$ , 100%);  $^1H$ -NMR(CDCl $_3$ ):  $\delta$  = 2.6 ppm (d, 4H; CH $_2$  of dppe), 3.5 ppm (m, 4H; CH $_2$  of dppm), 7.1-8.0 ppm (m, 60H; phenyl); Element analysis: calcd (%) for C $_{76}H_{68}F_{12}P_8Pd_2PtSe_4 \cdot 2CH_2Cl_2 \cdot H_2O$ (2368.66): C 39.55, H 3.15; Found(%): C 39.61, H 3.24. Red crystals of {PtSe $_2$ [PdSe(dppm)] $_2$ (dppe)}(PF $_6$ ) $_2$  suitable for X-ray crystallographic analysis were obtained from slow diffusion in the mixture of  $CH_2Cl_2$  /hexane. Yield: 31 mg, 65%.

**[Pt $_3$ ( $\mu_3$ -Se) $_2$ (dppe)( $\eta$ -dppmSe) $_2$ ](PF $_6$ ) $_2$  9.** ESI-MS (MeOH/H $_2$ O): m/z (%) 1074 ([M+2MeOH] $^{2+}$ , 85%), 1034 ([M+2MeOH-Se] $^{2+}$ , 80%), 995 ([M+2MeOH-2Se] $^{2+}$ , 100%), 956 ([M+2MeOH-3Se] $^{2+}$ , 70%);  $^1H$ -NMR(CDCl $_3$ ):  $\delta$  = 2.4 ppm (d, 4H; CH $_2$  of dppe), 3.5 ppm (m, 4H; CH $_2$  of dppm), 7.1-7.9 ppm (m, 60H; phenyl);  $^{31}P\{^1H\}$ NMR (CDCl $_3$ ):  $\delta_P$  = -56.9ppm (m,  $^1J_{(Pt-P)}$  = 2867 Hz), 38.6 ppm (d), 42.8ppm (m,  $^1J_{(Pt-P)}$  = 3268 Hz); Element analysis: calcd (%) for C $_{76}H_{68}F_{12}P_8Pt_3Se_4 \cdot CH_2Cl_2 \cdot H_2O$ (2462.83): C 37.58, H 2.95; Found(%): C 37.42, H 2.87. Yield: 22 mg, 42%.

### X-ray Crystal Structure Determination and Refinement

The selected bond lengths and angles for complexes **8** are given in Table 1. All measurements were made on a Bruker AXS SMART APEX diffractometer equipped with a CCD area detector by using Mo $K_{\alpha}$  radiation ( $\lambda$  = 0.71073 Å). The software SMART $^4$  was used for the collection of data frames, for indexing reflections, and to determine lattice parameters; SAINT $^4$  was used for the integration of the intensity of the reflections and for scaling; SADABS $^5$  was used for empirical absorption correction; and SHELXTL $^6$  was used for space group and structure determination, refinements, graphics, and structure reporting. The structure was refined by full-matrix least squares on  $F^2$  with anisotropic thermal

parameters for non-hydrogen atoms. A summary of crystallographic parameters for the data collections and refinements is given in Table 2.

Table 1 Selected bond lengths Å and angles ° for **8**

|                   |            |                   |           |
|-------------------|------------|-------------------|-----------|
| Pt(1)-P(1)        | 2.241(2)   | Pd(2)-Se(4)       | 2.412(5)  |
| Pt(1)-P(2)        | 2.261(2)   | Pd(2)-Se(6)       | 2.457(4)  |
| Pt(1)-Se(4)       | 2.451(8)   | Pd(3)-Se(7)       | 2.458(1)  |
| Pt(1)-Se(5)       | 2.492(2)   | Pd(3)-Se(5)       | 2.485(8)  |
| Se(6)-P(4)        | 2.174(2)   | Se(7)-P(6)        | 2.173(2)  |
| Pd(3)-Se(4)       | 2.415(3)   | Pd(3)-Se(5)       | 2.485(8)  |
| Pd(2)-Se(5)       | 2.482(1)   | Pd(2)-P(3)        | 2.261(2)  |
| Pd(3)-P(5)        | 2.246(2)   | Pd(2)-Pd(3)       | 3.2414(9) |
| Pt(1)-Pd(3)       | 3.1218(12) |                   |           |
| P(1)-Pt(1)-P(2)   | 85.59(8)   | P(1)-Pt(1)-Se(4)  | 93.06(6)  |
| Se(4)-Pt(1)-Se(5) | 80.33(3)   | Se(4)-Pd(2)-Se(5) | 173.44(6) |
| Pd(2)-Se(4)-Pd(3) | 84.35(3)   | Pd(2)-Se(5)-Pd(3) | 81.46(3)  |
| P(4)-Se(6)-Pd(2)  | 100.46(6)  | P(5)-Pd(3)-Se(7)  | 93.68(6)  |

Table 2 Crystallographic data and refinement for complex **8**

| Complex                                      | <b>8</b>                                                                                                             |                                               |           |
|----------------------------------------------|----------------------------------------------------------------------------------------------------------------------|-----------------------------------------------|-----------|
| Empirical formula                            | C <sub>77</sub> H <sub>70</sub> Cl <sub>2</sub> F <sub>12</sub> P <sub>8</sub> Pd <sub>2</sub> Pt<br>Se <sub>4</sub> | Formula weight                                | 2265.72   |
| Temperature [K]                              | 223(2)                                                                                                               | Wavelength [Å]                                | 0.71073   |
| Crystal system                               | Monoclinic                                                                                                           | Space group                                   | P2(1)/c   |
| <i>a</i> [Å]                                 | 13.701(3)                                                                                                            | <i>b</i> [Å]                                  | 18.914(7) |
| <i>c</i> [Å]                                 | 32.456(1)                                                                                                            | $\alpha$ [°]                                  | 90        |
| $\beta$ [°]                                  | 100.41(4)                                                                                                            | $\gamma$ [°]                                  | 90        |
| Volume [Å <sup>3</sup> ]                     | 8272.6(5)                                                                                                            | <i>Z</i>                                      | 4         |
| Density (calculated)<br>[Mg/m <sup>3</sup> ] | 1.819                                                                                                                | Absorption<br>coefficient [mm <sup>-1</sup> ] | 4.165     |

|                              |        |                                                      |               |
|------------------------------|--------|------------------------------------------------------|---------------|
| Reflections collected        | 58501  | Independent reflections                              | 18994         |
| $R_{\text{int}}$             | 0.0795 | $R (F, F^2 > 2\sigma)$                               | 0.0591        |
| $R_w (F^2, \text{all data})$ | 0.1320 | Parameters                                           | 982           |
| Goodness-of-fit on $F^2$     | 0.960  | Largest diff. peak and hole [ $e \text{ \AA}^{-3}$ ] | 2.050, -1.079 |

---

## Reference

1. D. L. Klayman and T. S. Griffin, *J. Am. Chem. Soc.*, 1973, **95**, 197.
2. L. S. Benner and A. L. Balch, *J. Am. Chem. Soc.*, 1978, **100**, 6099.
3. R. J. Puddephatt, M. P. Brown and M. Rashidi, *J. Chem. Soc., Dalton Trans.*, 1977, 951.
4. v. SMART & SAINT Software Reference Manuals, Siemens Energy & Automation, Inc., Analytical Instrumentation, Madison, WI (USA), 1996.
5. S. G. M. Sheldrick, a software for empirical adsorption correction, University of Göttingen, Göttingen (Germany), 1993.
6. S. G. M. Sheldrick, VERSION 5.03, Siemens Energy & Automation, Inc., Analytical Instrumentation, Madison, WI (USA), 1996.
